# Supplementary material
Source: Springer Nature journal article supplement (https://www.springermedizin.de/resource/supplementary/12943_2006_182_MOESM9_ESM.pdf/9553624)

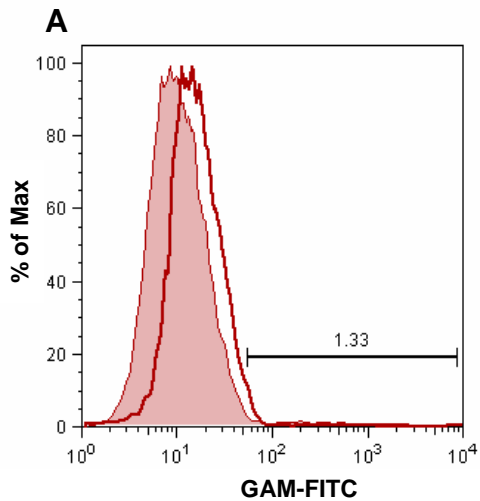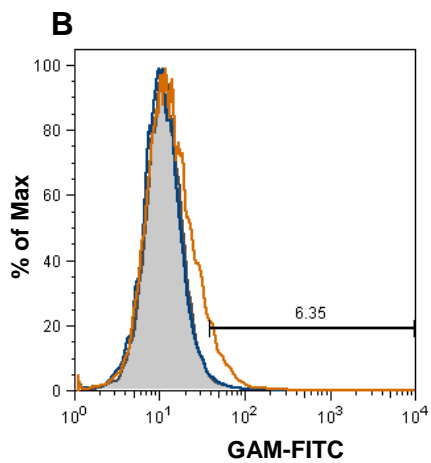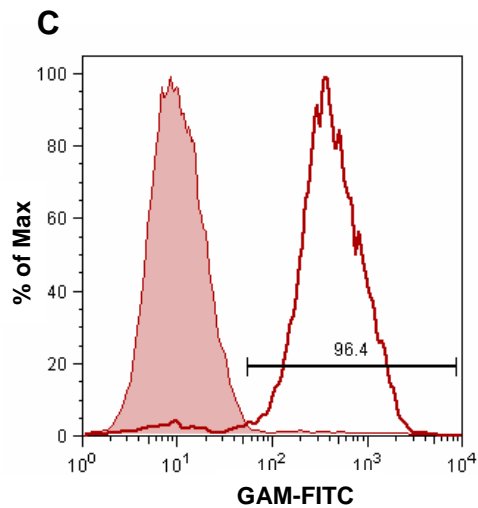

Supplement: MOESM9 [file 9553624]
